# Supplementary material for: The electrochemical transfer of CVD-graphene using agarose gel as solid electrolyte and mechanical support layer
Source: Royal Society of Chemistry journal article supplement (doi:10.1039/c4cc09404b), 2014-12-24
Supplement: c4cc09404b1.pdf [file c4cc09404b1.pdf]

## Supporting Information

### The Electrochemical Transfer of CVD-Graphene Using Agarose Gel as Solid Electrolyte and Mechanical Support Layer

Dayong Zhang, Zhi Jin\*, Jingyuan Shi, Xuanyun Wang, Songang Peng and Shaoqing Wang

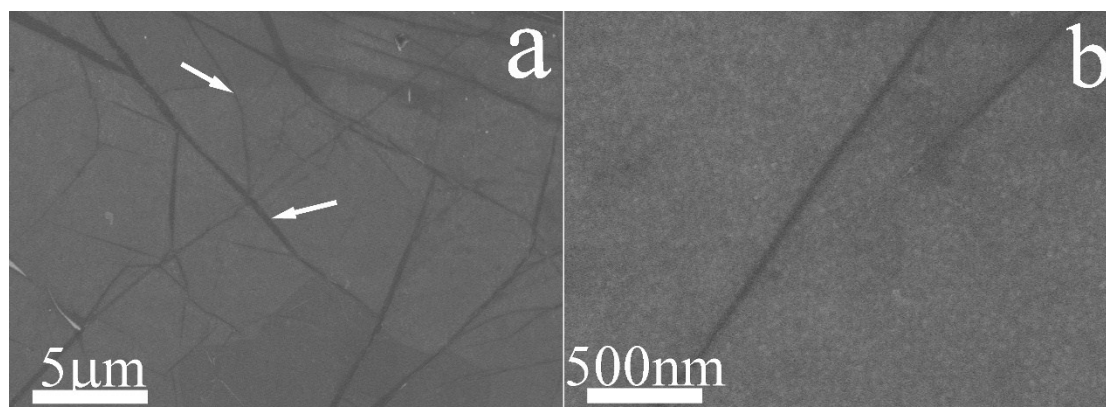

Figure S1. Scanning electron microscopy (SEM) images of the graphene transferred on SiO<sub>2</sub> substrate. The white arrows in panel a show the wrinkles in graphene sheet.
